# Supplementary material for: A Genetic Map of Ostrich Z Chromosome and the Role of Inversions in Avian Sex Chromosome Evolution
Source: PubMed Central journal article supplement — Genome Biol Evol. 2018 Aug 7;10(8):2049–60. doi: 10.1093/gbe/evy163 (PMC6105114; doi:10.1093/gbe/evy163), 2018-08-07
Supplement: evy163_supplementary_information_180817.pdf [file evy163_supplementary_information_180817.pdf]

## **Supplementary Information**

**A genetic map of ostrich Z chromosome and the role of inversions in avian sex chromosome evolution**

**Homa Papoli Yazdi, Hans Ellegren**

## Supplementary Material and Methods

### Linkage analysis with CRIMAP

In order to build a genetic map in CRIMAP, two loci must be chosen as ordered loci in the first run. In the end, the resulting map length can vary depending on which two loci are chosen. It is recommended according to CRIMAP tutorial

(<https://www.animalgenome.org/bioinfo/resources/manuals/Embnetut/Crimap/manuatoc.html>) to build the map choosing multiple pairs of loci from TWOPOINT analysis that have a large inter-locus distance (rec.fracs) and large confidence (LODs). Choosing loci that are far apart for the initial map has the advantage that the BUILD run may reach more distant loci on either side of the map. However, this may be associated with more errors in the relative positions of loci. For this reason, BUILD runs are best followed by FLIPSN runs, which iteratively evaluate different orders. Maps from these trials can be used as ordered loci for subsequent BUILD runs where all remaining loci are to be inserted.

In order to build the ostrich Z chromosome map, 10 pairs of loci were chosen based on TWOPOINT analysis. For each run, sex-specific maps were generated. BUILD was run in a series of steps as follows:

1. Run BUILD with LOD = 6. Use two loci from TWOPOINT analysis as ordered loci. Run FLIPS4 to iteratively evaluate different orders, rearranging four adjacent markers at a time, until no better order could be found. This is the frame work map.
2. Run BUILD with LOD = 5. Use the ordered loci obtained from the previous step as ordered loci. Run FLIPS4.

3. Run BUILD with LOD = 4. Use the ordered loci obtained from the previous step as ordered loci. Run FLIPS4.
4. Run BUILD with LOD = 3. Use the ordered loci obtained from the previous step as ordered loci. Run FLIPS4. This is the best order map.

### **Inversion analysis using GRIMM and baobabLUNA**

Gene order and orientation are commonly modelled with a signed permutation as in the GRIMM algorithm (Tesler 2002). Three main goals in an inversion analysis are identifying the number of inversion events from an ancestral to a descendent sequence, the breakpoints of inversions and the order of inversion events. The number of inversion events is calculated based on parsimony principles, which means that the scenario associated with the least number of events is considered as the optimal scenario. Inferring the position of breakpoints is a more challenging task as multiple optimal inversion scenarios with different sets of breakpoints can exist. However, GRIMM reports only one scenario. In contrast, the program baobabLUNA (Braga 2009) uses an algorithm that give a summary of all possible parsimonious inversion scenarios.

For the GRIMM analysis, we used the ancestral lineage as the source genome and the descendent lineage as the destination genome (Table 1). In order to extend the GRIMM analysis, we used every pair of inferred ancestral and descendent sequences as input to baobabLUNA. All permutations were polarized according to the lizard state. The module analyzeTrace of baobabLUNA sorts every permutation to the sorted sequence of ancestral block numbers. In order to use analyzeTrace, we first reordered every descendent lineage

based on the most recent ancestral state by recoding one permutation based on another, as described with a permutation example in Figure 1.

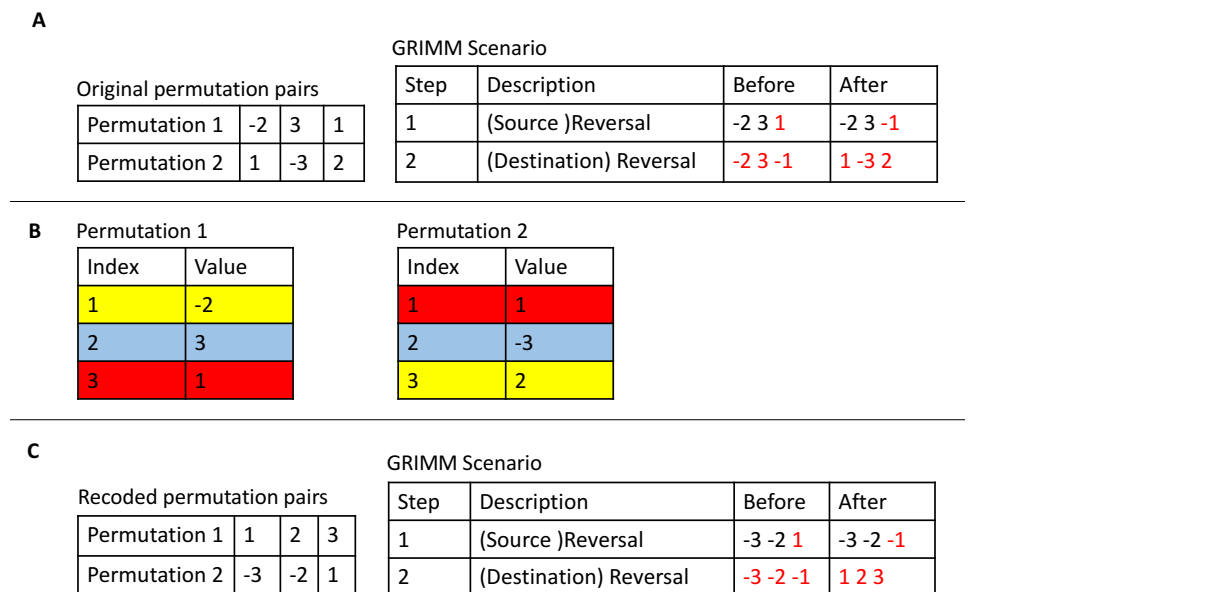

**Figure 1.** Recoding algorithm to obtain the baobabLUNA input. (A) Original permutation pairs with the GRIMM inversion scenario. (B) Tables indicating the indices of every element of a given permutation. (C) Recoded permutation pairs and their respective GRIMM scenario.

Figure 1A describes the original permutation pairs used in the GRIMM analysis. In order to recode the original permutations to the input of baobabLUNA analyzeTrace, the following steps were performed (Figure 1B):

1. For every index in permutation 1, check its absolute value. For example, the absolute value of index 1 is 2.
2. Find the index of that absolute value in permutation 2. The index of 2 is 3.
3. If the values of the indices have opposite signs, insert the minus sign in the second permutation. Otherwise, keep the signs the same.
4. Output the signed indices of permutation 1 and permutation 2 for that value. For example, for value 2, the indices 1 and 3 become 1 and -3 (Figure 1C).

After recoding every ancestral-descendent pair (Table 2), we used baobabLUNA to obtain all possible solutions of the inversion scenario (Table 3). We denote them with the set notation, each set containing the inverted block(s). The scripts for this analysis can be found in [https://github.com/Homap/inversions\\_breakpoints\\_simulation](https://github.com/Homap/inversions_breakpoints_simulation).

**Table 1.** Input for GRIMM analysis.

| Ancestral lineage (source genome)                                                        | Descendent lineage (destination genome)                                                  |
|------------------------------------------------------------------------------------------|------------------------------------------------------------------------------------------|
| Lizard<br>1,2,3,4,5,6,7,8,9,10,11,12,13,14,15,16,17,18                                   | Palaeognathae-Neognathae ancestor<br>1,-2,-3,4,5,6,7,8,9,10,11,17,-14,-13,-12,18,-15,-16 |
| Palaeognathae-Neognathae ancestor<br>1,-2,-3,4,5,6,7,8,9,10,11,17,-14,-13,-12,18,-15,-16 | Galloanserae-Neoaves ancestor<br>1,-2,-3,4,5,6,12,13,14,-17,-11,-10,-9,-18,7,8,-15,-16   |
| Galloanserae-Neoaves ancestor<br>1,-2,-3,4,5,6,12,13,14,-17,-11,-10,-9,-18,7,8,-15,-16   | Galliformes ancestor<br>1,-2,-3,4,5,6,12,13,14,-17,-11,-10,-9,18,-8,-7,-15,-16           |
| Galloanserae-Neoaves ancestor<br>1,-2,-3,4,5,6,12,13,14,-17,-11,-10,-9,-18,7,8,-15,-16   | Passeriformes ancestor<br>1,-2,-3,4,5,6,12,13,14,-17,-10,-9,-18,16,15,-11,-8,-7          |
| Palaeognathae-Neognathae ancestor<br>1,-2,-3,4,5,6,7,8,9,10,11,17,-14,-13,-12,18,-15,-16 | Ostrich<br>1,-2,-3,4,5,6,7,8,9,10,11,17,-14,15,-18,12,16,-13                             |
| Galliformes ancestor<br>1,-2,-3,4,5,6,12,13,14,-17,-11,-10,-9,18,-8,-7,-15,-16           | Quail<br>1,-5,-4,-2,-3,6,12,13,14,-17,-11,-10,-9,18,-8,-7,-15,-16                        |
| Passeriformes ancestor<br>1,-2,-3,4,5,6,12,13,14,-17,-10,-9,-18,16,15,-11,-8,-7          | Flycatcher<br>1,-2,-3,4,5,6,12,13,14,-17,-10,-9,-18,16,15,-11,8,-7                       |
| Passeriformes ancestor<br>1,-2,-3,4,5,6,12,13,14,-17,-10,-9,-18,16,15,-11,-8,-7          | Great tit<br>1,-2,-3,4,5,6,12,13,14,-17,-10,-9,-18,16,15,8,11,-7                         |
| Passeriformes ancestor<br>1,-2,-3,4,5,6,12,13,14,-17,-10,-9,-18,16,15,-11,-8,-7          | Zebra finch<br>-1,18,9,8,11,-15,-16,-2,-3,4,10,5,17,-14,-13,-12,-6,-7                    |

**Table 2.** Input for baobabLUNA analysis.

| Ancestral lineage                                                                 | Descendent lineage                                                                       |
|-----------------------------------------------------------------------------------|------------------------------------------------------------------------------------------|
| Lizard<br>1,2,3,4,5,6,7,8,9,10,11,12,13,14,15,16,17,18                            | Palaeognathae-Neognathae ancestor<br>1,-2,-3,4,5,6,7,8,9,10,11,17,-14,-13,-12,18,-15,-16 |
| Palaeognathae-Neognathae ancestor<br>1,2,3,4,5,6,7,8,9,10,11,12,13,14,15,16,17,18 | Galloanserae-Neoaves ancestor<br>1,2,3,4,5,6,-15,-14,-13,-12,-11,-10,-9,-16,7,8,17,18    |
| Galloanserae-Neoaves ancestor<br>1,2,3,4,5,6,7,8,9,10,11,12,13,14,15,16,17,18     | Galliformes ancestor<br>1,2,3,4,5,6,7,8,9,10,11,12,13,-14,-16,-15,17,18                  |
| Galloanserae-Neoaves ancestor<br>1,2,3,4,5,6,7,8,9,10,11,12,13,14,15,16,17,18     | Passeriformes ancestor<br>1,2,3,4,5,6,7,8,9,10,12,13,14,-18,-17,11,-16,-15               |
| Palaeognathae-Neognathae ancestor<br>1,2,3,4,5,6,7,8,9,10,11,12,13,14,15,16,17,18 | Ostrich<br>1,2,3,4,5,6,7,8,9,10,11,12,13,-17,-16,-15,-18,14                              |
| Galliformes ancestor<br>1,2,3,4,5,6,7,8,9,10,11,12,13,14,15,16,17,18              | Quail<br>1,-5,-4,2,3,6,7,8,9,10,11,12,13,14,15,16,17,18                                  |
| Passeriformes ancestor<br>1,2,3,4,5,6,7,8,9,10,11,12,13,14,15,16,17,18            | Flycatcher<br>1,2,3,4,5,6,7,8,9,10,11,12,13,14,15,16,-17,18                              |
| Passeriformes ancestor<br>1,2,3,4,5,6,7,8,9,10,11,12,13,14,15,16,17,18            | Great tit<br>1,2,3,4,5,6,7,8,9,10,11,12,13,14,15,-17,-16,18                              |
| Passeriformes ancestor<br>1,2,3,4,5,6,7,8,9,10,11,12,13,14,15,16,17,18            | Zebra finch<br>-1,-13,-12,-17,-16,-15,-14,2,3,4,-11,5,-10,-9,-8,-7,-6,18                 |

**Table 3.** Inversion scenarios obtained by baobabLUNA.

|                                                                                                                                                                                                                                                                                                                                                                                                                                                                                                                                                                                                                                                                                                                                                                                                             |
|-------------------------------------------------------------------------------------------------------------------------------------------------------------------------------------------------------------------------------------------------------------------------------------------------------------------------------------------------------------------------------------------------------------------------------------------------------------------------------------------------------------------------------------------------------------------------------------------------------------------------------------------------------------------------------------------------------------------------------------------------------------------------------------------------------------|
| Inversion scenarios obtained by baobabLUNA                                                                                                                                                                                                                                                                                                                                                                                                                                                                                                                                                                                                                                                                                                                                                                  |
| Lizard -> Palaeognathae-Neognathae ancestor<br>$\{2\}^* \{3\} \{12.13.14.15.17.18\} \{12.13.14.16.17.18\} \{12.13.14.15.16.17\} \{15.16.17\}$<br>$\{2\} \{3\} \{12.13.14.17\} \{17\} \{15.17.18\} \{16.17.18\}$ : GRIMM solution                                                                                                                                                                                                                                                                                                                                                                                                                                                                                                                                                                            |
| Palaeognathae-Neognathae ancestor -> Galloanserae-Neoaves ancestor<br>$\{7.8.16\} \{7.8.9.10.11.12.13.14.15\}$ : GRIMM solution                                                                                                                                                                                                                                                                                                                                                                                                                                                                                                                                                                                                                                                                             |
| Galloanserae-Neoaves ancestor -> Galliformes ancestor<br>$\{14\} \{15.16\}$ : GRIMM solution                                                                                                                                                                                                                                                                                                                                                                                                                                                                                                                                                                                                                                                                                                                |
| Galloanserae-Neoaves ancestor -> Passeriformes ancestor<br>$\{11.15.16.17.18\} \{11.12.13.14.15.16\} \{12.13.14.15.16\}$ : GRIMM solution                                                                                                                                                                                                                                                                                                                                                                                                                                                                                                                                                                                                                                                                   |
| Palaeognathae-Neognathae ancestor -> Ostrich<br>$\{14.18\} \{14.15.16.17\}$ : GRIMM solution                                                                                                                                                                                                                                                                                                                                                                                                                                                                                                                                                                                                                                                                                                                |
| Galliformes ancestor -> Quail<br>$\{2.3\} \{2.3.4.5\}$ : GRIMM solution                                                                                                                                                                                                                                                                                                                                                                                                                                                                                                                                                                                                                                                                                                                                     |
| Passeriformes ancestor -> Flycatcher<br>$\{17\}$ : GRIMM solution                                                                                                                                                                                                                                                                                                                                                                                                                                                                                                                                                                                                                                                                                                                                           |
| Passeriformes ancestor -> Great tit<br>$\{16.17\}$ : GRIMM solution                                                                                                                                                                                                                                                                                                                                                                                                                                                                                                                                                                                                                                                                                                                                         |
| Passeriformes ancestor -> Zebra finch<br>$\{1\} \{2.3.4.5.6.7.8.9.10.11.14.15.16.17\} \{5.6.7.8.9.10\} \{5.6.7.8.9.10.11\} \{6.7.8.9.10\} \{2.3.4.5.6.7.8.9.10.11.12.13\}$ : GRIMM solution<br>$\{1.12.13.14.15.16.17\} \{1.2.3.4.5.11.12.13\} \{1.2.3.4.11.12.13\} \{1.2.3.4.12.13\} \{1.2.3.4.5.14.15.16.17\} \{6.7.8.9.10.11.12.13.14.15.16.17\}$<br>$\{1.12.13.14.15.16.17\} \{5.6.7.8.9.10\} \{6.7.8.9.10\} \{1.2.3.4.12.13\} \{1.2.3.4.14.15.16.17\} \{5.6.7.8.9.10.11.12.13.14.15.16.17\}$<br>$\{1.12.13.14.15.16.17\} \{1.2.3.4.5.11.12.13\} \{1.2.3.4.5.11.14.15.16.17\} \{6.7.8.9.10.12.13.14.15.16.17\} \{5.6.7.8.9.10\} \{5.6.7.8.9.10.11\}$<br>$\{1.12.13.14.15.16.17\} \{6.7.8.9.10\} \{1.2.3.4.11.12.13\} \{1.2.3.4.11.14.15.16.17\} \{5.6.7.8.9.10.12.13.14.15.16.17\} \{5.6.7.8.9.10.11\}$ |

\* Each set indicates the block or a series of adjacent blocks that is inverted every step.

## Supplementary Tables

**Table S1.** Male pools used for SNP identification from (Adolfsson and Ellegren 2013).

| Pool             |       | NCBI<br>Accession | Sample1 | Sample2 | Sample3 |
|------------------|-------|-------------------|---------|---------|---------|
| Ostrich<br>Male1 | Brain | SRX142690         | 2_13_BM | 3_15_BM |         |
| Ostrich<br>Male2 | Brain | SRX143226         | 4_16_BM | 6_21_BM |         |
| Ostrich<br>Male3 | Brain | SRX145593         | 7_22_BM | 9_26_BM |         |
| Ostrich<br>Male1 | Gonad | -*                | 1_12_GM | 2_13_GM | 3_15_GM |
| Ostrich<br>Male2 | Gonad | -*                | 4_16_GM | 5_21_GM |         |
| Ostrich<br>Male3 | Gonad | -*                | 6_22_GM | 7_26_GM |         |
| Ostrich<br>Male1 | Liver | SRX151868         | 1_7_LM  | 2_12_LM |         |
| Ostrich<br>Male2 | Liver | SRX153141         | 3_13_LM | 4_15_LM | 5_6_LM  |
| Ostrich<br>Male3 | Liver | SRX154477         | 6_21_LM | 7_22_LM | 8_26_LM |

\* Male gonad samples were not used in Adolfsson and Ellegren 2013, hence, the data are not deposited in NCBI. The raw reads of male gonads are available upon request.



**Table S2.** SNP filtering steps for genetic mapping.

| SNP filtering steps                                                  | Comments                                                                                                                                  | Number of SNPs removed | Number of SNPs |
|----------------------------------------------------------------------|-------------------------------------------------------------------------------------------------------------------------------------------|------------------------|----------------|
| SNPs submitted for genotyping                                        |                                                                                                                                           |                        | 384            |
| SNPs genotyped as reported in the vcf file                           | 15 SNPs were not reported in the vcf file. 2 due to low call rate and 13 because they were monomorphic so they wouldn't show in vcf file. | 15                     | 369            |
| Removing SNPs in scaffolds 1386 and 294                              |                                                                                                                                           | 4                      | 365            |
| genotype quality < 30                                                |                                                                                                                                           | 3                      | 362            |
| SNPs heterozygote for all individuals                                |                                                                                                                                           | 1                      | 361            |
| Indels or SNPs with more than two alleles                            |                                                                                                                                           | 8                      | 353            |
| Removing (SNPs with sample call rate < 90% (Range: 11-89%) = 24 SNP) | 22 SNPs were in the vcf, the last 2 SNPs were not in the vcf (colored red)                                                                |                        |                |
| SNPs with low call rate already removed in Indel removal             | 8 SNPs                                                                                                                                    |                        |                |
| Final Number of SNPs with low sample call rate removed               |                                                                                                                                           | 14                     | 339            |
| SNPs removed because females were heterozygous in non-PAR region     |                                                                                                                                           | 6                      | <b>333</b>     |

**Table S3.** Individual filtering steps for genetic mapping.

| <b>Individual filtering steps</b>                               | <b>Comments</b>                                              | <b>Number of samples removed</b> | <b>Parents</b> | <b>Offspring</b> | <b>Number of samples</b> |
|-----------------------------------------------------------------|--------------------------------------------------------------|----------------------------------|----------------|------------------|--------------------------|
| Samples submitted for genotyping                                |                                                              |                                  | 44             | 214              | 258                      |
| Samples with number of inheritance errors > 5                   |                                                              | 9                                |                | 205              |                          |
| Samples with uncertain sex                                      |                                                              | 9                                |                | 196              |                          |
| Samples with low genotype call rate = 4 samples                 | Already removed in inheritance error and uncertain sex steps | 0                                |                | 196              |                          |
| Identical samples due to contamination, from different families | 142_986 already removed in previous steps                    | 1                                |                | 195              |                          |
| Identical samples with no explanations, from the same family    | 185_816, 185_929, 146_681, 146_809                           | 2                                |                | 193              |                          |
| Families with number of markers in segregation distortion > 6   | Family 56 – 2 parents and 5 offspring                        | 7                                | 42             | 188              | <b>230</b>               |

**Table S4.** List of SNPs and genes covered by the genetic map.

| No | Scaffold_SNPposition     | <i>G.gallus</i> Gene ID | <i>S.camelus</i> Gene ID |
|----|--------------------------|-------------------------|--------------------------|
| 1  | superscaffold26_44551    | ENSGALG00000002805      | Sca_R015347              |
| 2  | superscaffold26_57111    | ENSGALG00000002805      | Sca_R015347              |
| 3  | superscaffold26_127813   | ENSGALG00000002839      | Sca_R015349              |
| 4  | superscaffold26_751130   | ENSGALG00000003087      | Sca_R005880              |
| 5  | superscaffold26_785762   | ENSGALG00000003066      | Sca_R005881              |
| 6  | superscaffold26_1082202  | ENSGALG00000003019      | Sca_R005886              |
| 7  | superscaffold26_1102598  | ENSGALG00000003019      | Sca_R005886              |
| 8  | superscaffold26_1113307  | ENSGALG00000003019      | Sca_R005886              |
| 9  | superscaffold26_3461665  | ENSGALG00000002777      | Sca_R005903              |
| 10 | superscaffold26_3463963  | ENSGALG00000002777      | Sca_R005903              |
| 11 | superscaffold26_3677222  | ENSGALG00000002677      | Sca_R005908              |
| 12 | superscaffold26_3682803  | ENSGALG00000002677      | Sca_R005908              |
| 13 | superscaffold26_4790876  | ENSGALG00000001843      | Sca_R005917              |
| 14 | superscaffold26_4810948  | ENSGALG00000001843      | Sca_R005917              |
| 15 | superscaffold26_5215322  | ENSGALG000000014644     | Sca_R005922              |
| 16 | superscaffold26_5218700  | ENSGALG000000014644     | Sca_R005922              |
| 17 | superscaffold26_10282269 | ENSGALG000000014168     | Sca_R007593              |
| 18 | superscaffold26_10507222 | ENSGALG00000005800      | Sca_R007599              |
| 19 | superscaffold26_11691141 | ENSGALG00000002009      | Sca_R015071              |
| 20 | superscaffold26_11695127 | ENSGALG00000002009      | Sca_R015071              |
| 21 | superscaffold26_11711236 | ENSGALG00000002023      | Sca_R015072              |
| 22 | superscaffold26_11729013 | ENSGALG00000002069      | Sca_R015074              |
| 23 | superscaffold26_12078493 | ENSGALG00000002326      | Sca_R015078              |
| 24 | superscaffold26_12089137 | ENSGALG00000002326      | Sca_R015078              |
| 25 | superscaffold26_12167171 | ENSGALG00000002371      | Sca_R015079              |
| 26 | superscaffold26_12175653 | ENSGALG00000002371      | Sca_R015079              |
| 27 | superscaffold26_12403910 | ENSGALG00000002412      | Sca_R009831              |
| 28 | superscaffold26_12445606 | ENSGALG00000002523      | Sca_R009834              |
| 29 | superscaffold26_12448133 | ENSGALG00000002523      | Sca_R009834              |
| 30 | superscaffold26_12540349 | ENSGALG00000002578      | Sca_R009836              |
| 31 | superscaffold26_13125126 | ENSGALG00000003168      | Sca_R009848              |
| 32 | superscaffold26_13949850 | ENSGALG00000003353      | Sca_R009859              |
| 33 | superscaffold26_13951571 | ENSGALG00000003353      | Sca_R009859              |
| 34 | superscaffold26_13980754 | ENSGALG00000003365      | Sca_R009860              |
| 35 | superscaffold26_14007530 | ENSGALG00000003432      | Sca_R009863              |
| 36 | superscaffold26_14313172 | ENSGALG000000013376     | Sca_R009870              |
| 37 | superscaffold26_14348417 | ENSGALG000000013377     | Sca_R009872              |
| 38 | superscaffold26_14362307 | ENSGALG000000013377     | Sca_R009872              |
| 39 | superscaffold26_14405256 | ENSGALG00000003558      | Sca_R009874              |
| 40 | superscaffold26_14412022 | ENSGALG00000003558      | Sca_R009874              |
| 41 | superscaffold26_14449954 | ENSGALG000000021304     | Sca_R009875              |
| 42 | superscaffold26_14451167 | ENSGALG000000021304     | Sca_R009875              |
| 43 | superscaffold26_14455695 | ENSGALG000000021304     | Sca_R009875              |
| 44 | superscaffold26_14987729 | ENSGALG00000003708      | Sca_R009889              |
| 45 | superscaffold26_15096314 | ENSGALG00000003708      | Sca_R009889              |
| 46 | superscaffold26_15381119 | ENSGALG00000003726      | Sca_R009893              |
| 47 | superscaffold26_15406896 | ENSGALG00000003726      | Sca_R009893              |
| 48 | superscaffold26_15440957 | ENSGALG00000003733      | Sca_R009894              |

|    |                          |                    |             |
|----|--------------------------|--------------------|-------------|
| 49 | superscaffold26_15450690 | ENSGALG00000003733 | Sca_R009894 |
| 50 | superscaffold26_15593125 | ENSGALG00000003747 | Sca_R009899 |
| 51 | superscaffold26_15598338 | ENSGALG00000003747 | Sca_R009899 |
| 52 | superscaffold26_15601723 | ENSGALG00000003747 | Sca_R009899 |
| 53 | superscaffold26_15662822 | ENSGALG00000003775 | Sca_R009900 |
| 54 | superscaffold26_15757822 | ENSGALG00000003792 | Sca_R009902 |
| 55 | superscaffold26_16398849 | ENSGALG00000014835 | Sca_R009915 |
| 56 | superscaffold26_16400861 | ENSGALG00000014835 | Sca_R009915 |
| 57 | superscaffold26_16404183 | ENSGALG00000014835 | Sca_R009915 |
| 58 | superscaffold26_16414650 | ENSGALG00000014835 | Sca_R009915 |
| 59 | superscaffold26_16718019 | ENSGALG00000014846 | Sca_R015001 |
| 60 | superscaffold26_16759866 | ENSGALG00000014846 | Sca_R015001 |
| 61 | superscaffold26_16785314 | ENSGALG00000014851 | Sca_R014999 |
| 62 | superscaffold26_16787479 | ENSGALG00000014851 | Sca_R014999 |
| 63 | superscaffold26_17050967 | ENSGALG00000014855 | Sca_R014998 |
| 64 | superscaffold26_17052813 | ENSGALG00000014855 | Sca_R014998 |
| 65 | superscaffold26_17083966 | ENSGALG00000023503 | Sca_R014997 |
| 66 | superscaffold26_17084513 | ENSGALG00000023503 | Sca_R014997 |
| 67 | superscaffold26_17212085 | ENSGALG00000014863 | Sca_R014992 |
| 68 | superscaffold26_17219158 | ENSGALG00000014863 | Sca_R014992 |
| 69 | superscaffold26_17225443 | ENSGALG00000014865 | Sca_R014991 |
| 70 | superscaffold26_17229657 | ENSGALG00000014865 | Sca_R014991 |
| 71 | superscaffold26_17234708 | ENSGALG00000014865 | Sca_R014991 |
| 72 | superscaffold26_17251315 | ENSGALG00000014867 | Sca_R014990 |
| 73 | superscaffold26_17287868 | ENSGALG00000014869 | Sca_R014989 |
| 74 | superscaffold26_17289001 | ENSGALG00000014869 | Sca_R014989 |
| 75 | superscaffold26_17298508 | ENSGALG00000014869 | Sca_R014989 |
| 76 | superscaffold26_19402555 | ENSGALG00000014906 | Sca_R007254 |
| 77 | superscaffold26_20228145 | ENSGALG00000014700 | Sca_R007266 |
| 78 | superscaffold26_20230788 | ENSGALG00000014700 | Sca_R007266 |
| 79 | superscaffold26_20235348 | ENSGALG00000014700 | Sca_R007266 |
| 80 | superscaffold26_20410837 | ENSGALG00000014712 | Sca_R007269 |
| 81 | superscaffold26_20418429 | ENSGALG00000014712 | Sca_R007269 |
| 82 | superscaffold26_20474443 | ENSGALG00000014713 | Sca_R007270 |
| 83 | superscaffold26_20553918 | ENSGALG00000014716 | Sca_R007274 |
| 84 | superscaffold26_20555257 | ENSGALG00000014716 | Sca_R007274 |
| 85 | superscaffold26_20557374 | ENSGALG00000014716 | Sca_R007274 |
| 86 | superscaffold26_20559480 | ENSGALG00000014716 | Sca_R007274 |
| 87 | superscaffold26_20619747 | ENSGALG00000014717 | Sca_R007275 |
| 88 | superscaffold26_23058553 | ENSGALG00000014737 | Sca_R007303 |
| 89 | superscaffold26_23127061 | ENSGALG00000014740 | Sca_R007305 |
| 90 | superscaffold26_23175751 | ENSGALG00000014740 | Sca_R007305 |
| 91 | superscaffold26_23676705 | ENSGALG00000014743 | Sca_R007309 |
| 92 | superscaffold26_24230300 | ENSGALG00000014765 | Sca_R007316 |
| 93 | superscaffold26_24440101 | ENSGALG00000014773 | Sca_R007322 |
| 94 | superscaffold26_24471470 | ENSGALG00000014773 | Sca_R007322 |
| 95 | superscaffold26_24483208 | ENSGALG00000014773 | Sca_R007322 |
| 96 | superscaffold26_24534316 | ENSGALG00000014775 | Sca_R007323 |
| 97 | superscaffold54_101636   | ENSGALG00000000273 | Sca_R005537 |
| 98 | superscaffold54_4351427  | ENSGALG00000015288 | Sca_R004908 |
| 99 | superscaffold54_4357228  | ENSGALG00000015288 | Sca_R004908 |

|     |                          |                    |             |
|-----|--------------------------|--------------------|-------------|
| 100 | superscaffold54_4536437  | ENSGALG00000015301 | Sca_R004904 |
| 101 | superscaffold54_4543088  | ENSGALG00000015301 | Sca_R004904 |
| 102 | superscaffold54_4584366  | ENSGALG00000014682 | Sca_R004902 |
| 103 | superscaffold54_4594770  | ENSGALG00000014682 | Sca_R004902 |
| 104 | superscaffold54_4600603  | ENSGALG00000014682 | Sca_R004902 |
| 105 | superscaffold54_4602267  | ENSGALG00000014682 | Sca_R004902 |
| 106 | superscaffold54_4604721  | ENSGALG00000014682 | Sca_R004902 |
| 107 | superscaffold54_5010797  | ENSGALG00000014673 | Sca_R004897 |
| 108 | superscaffold54_5024726  | ENSGALG00000014672 | Sca_R004896 |
| 109 | superscaffold54_5037026  | ENSGALG00000014672 | Sca_R004896 |
| 110 | superscaffold54_5045452  | ENSGALG00000014670 | Sca_R004895 |
| 111 | superscaffold54_5060400  | ENSGALG00000014670 | Sca_R004895 |
| 112 | superscaffold54_5063420  | ENSGALG00000014670 | Sca_R004895 |
| 113 | superscaffold54_5071735  | ENSGALG00000014670 | Sca_R004895 |
| 114 | superscaffold54_5581580  | ENSGALG00000014664 | Sca_R004889 |
| 115 | superscaffold54_5789263  | ENSGALG00000014661 | Sca_R004887 |
| 116 | superscaffold54_5822338  | ENSGALG00000014661 | Sca_R004887 |
| 117 | superscaffold54_7118120  | ENSGALG00000014657 | Sca_R004882 |
| 118 | superscaffold54_7265897  | ENSGALG00000014657 | Sca_R004882 |
| 119 | superscaffold54_8682873  | ENSGALG00000015641 | Sca_R004874 |
| 120 | superscaffold54_8691455  | ENSGALG00000015641 | Sca_R004874 |
| 121 | superscaffold54_10967547 | ENSGALG00000015618 | Sca_R015534 |
| 122 | superscaffold54_11408895 | ENSGALG00000015603 | Sca_R015541 |
| 123 | superscaffold54_11768812 | ENSGALG00000015578 | Sca_R015547 |
| 124 | superscaffold54_11836266 | ENSGALG00000015572 | Sca_R015551 |
| 125 | superscaffold54_11841900 | ENSGALG00000020534 | Sca_R015552 |
| 126 | superscaffold54_11856445 | ENSGALG00000015571 | Sca_R015553 |
| 127 | superscaffold54_11876247 | ENSGALG00000002399 | Sca_R015555 |
| 128 | superscaffold54_11876945 | ENSGALG00000002399 | Sca_R015555 |
| 129 | superscaffold54_11881716 | ENSGALG00000002399 | Sca_R015555 |
| 130 | superscaffold54_11898445 | ENSGALG00000002430 | Sca_R015556 |
| 131 | superscaffold54_12192558 | ENSGALG00000014999 | Sca_R015560 |
| 132 | superscaffold54_12196074 | ENSGALG00000014999 | Sca_R015560 |
| 133 | superscaffold54_12229949 | ENSGALG00000015002 | Sca_R015561 |
| 134 | superscaffold54_12577065 | ENSGALG00000015019 | Sca_R015566 |
| 135 | superscaffold54_12617900 | ENSGALG00000015020 | Sca_R015567 |
| 136 | superscaffold54_12811464 | ENSGALG00000013511 | Sca_R015572 |
| 137 | superscaffold54_12817946 | ENSGALG00000013510 | Sca_R015573 |
| 138 | superscaffold54_12941527 | ENSGALG00000014923 | Sca_R015575 |
| 139 | superscaffold54_13308613 | ENSGALG00000014933 | Sca_R015580 |
| 140 | superscaffold54_13316142 | ENSGALG00000014939 | Sca_R015581 |
| 141 | superscaffold54_13316985 | ENSGALG00000014939 | Sca_R015581 |
| 142 | superscaffold54_13317222 | ENSGALG00000014939 | Sca_R015581 |
| 143 | superscaffold54_13323556 | ENSGALG00000014939 | Sca_R015581 |
| 144 | superscaffold54_13531853 | ENSGALG00000014948 | Sca_R015587 |
| 145 | superscaffold54_13569430 | ENSGALG00000014952 | Sca_R015589 |
| 146 | superscaffold54_13585041 | ENSGALG00000014952 | Sca_R015589 |
| 147 | superscaffold54_13586093 | ENSGALG00000014952 | Sca_R015589 |
| 148 | superscaffold54_13649894 | ENSGALG00000014956 | Sca_R015590 |
| 149 | superscaffold54_13662324 | ENSGALG00000014956 | Sca_R015590 |
| 150 | superscaffold54_13697371 | ENSGALG00000014958 | Sca_R015591 |

|     |                          |                    |             |
|-----|--------------------------|--------------------|-------------|
| 151 | superscaffold54_13708195 | ENSGALG00000014960 | Sca_R015592 |
| 152 | superscaffold54_14677259 | ENSGALG00000004390 | Sca_R015605 |
| 153 | superscaffold54_14707349 | ENSGALG00000004390 | Sca_R015605 |
| 154 | superscaffold54_14716468 | ENSGALG00000004390 | Sca_R015605 |
| 155 | superscaffold54_14773696 | ENSGALG00000004390 | Sca_R015605 |
| 156 | superscaffold54_14870242 | ENSGALG00000004425 | Sca_R015606 |
| 157 | superscaffold54_15192364 | ENSGALG00000004491 | Sca_R015608 |
| 158 | superscaffold54_15302743 | ENSGALG00000014819 | Sca_R015610 |
| 159 | superscaffold54_15686913 | ENSGALG00000014798 | Sca_R015618 |
| 160 | superscaffold54_15730142 | ENSGALG00000014789 | Sca_R015620 |
| 161 | superscaffold54_15751557 | ENSGALG00000014787 | Sca_R015622 |
| 162 | superscaffold54_15755405 | ENSGALG00000014787 | Sca_R015622 |
| 163 | superscaffold54_15757892 | ENSGALG00000014787 | Sca_R015622 |
| 164 | superscaffold54_15761051 | ENSGALG00000014787 | Sca_R015622 |
| 165 | superscaffold54_17132082 |                    | Sca_R015011 |
| 166 | superscaffold54_17135212 |                    | Sca_R015011 |
| 167 | superscaffold54_17400755 |                    | Sca_R015007 |
| 168 | superscaffold54_17531208 | NA                 | Intergenic  |
| 169 | superscaffold54_17583312 | NA                 | Intergenic  |
| 170 | superscaffold54_19307486 |                    | Sca_R014767 |
| 171 | superscaffold54_20660279 | NA                 | Intergenic  |
| 172 | superscaffold54_23591722 | NA                 | Intergenic  |
| 173 | superscaffold54_24116776 | NA                 | Intergenic  |
| 174 | superscaffold54_24537151 |                    | Sca_R003548 |
| 175 | superscaffold54_26201075 |                    | Sca_R003527 |
| 176 | superscaffold54_26590391 | NA                 | Intergenic  |
| 177 | superscaffold54_28046065 | NA                 | Intergenic  |
| 178 | superscaffold54_28671411 | NA                 | Intergenic  |
| 179 | superscaffold54_29189167 | NA                 | Intergenic  |
| 180 | superscaffold35_607384   | ENSGALG00000000253 | Sca_R012202 |
| 181 | superscaffold35_610663   | ENSGALG00000000253 | Sca_R012202 |
| 182 | superscaffold35_685590   | ENSGALG00000000247 | Sca_R012203 |
| 183 | superscaffold35_710305   | ENSGALG00000000247 | Sca_R012203 |
| 184 | superscaffold35_1413820  | ENSGALG00000000220 | Sca_R012208 |
| 185 | superscaffold35_1421370  | ENSGALG00000000220 | Sca_R012208 |
| 186 | superscaffold35_1422732  | ENSGALG00000000220 | Sca_R012208 |
| 187 | superscaffold35_1430082  | ENSGALG00000000220 | Sca_R012208 |
| 188 | superscaffold35_1432299  | ENSGALG00000000220 | Sca_R012208 |
| 189 | superscaffold35_1435107  | ENSGALG00000000220 | Sca_R012208 |
| 190 | superscaffold35_1452608  | ENSGALG00000000218 | Sca_R012209 |
| 191 | superscaffold35_1453584  | ENSGALG00000000218 | Sca_R012209 |
| 192 | superscaffold35_1466646  | ENSGALG00000023157 | Sca_R012210 |
| 193 | superscaffold35_1499038  | ENSGALG00000000215 | Sca_R012211 |
| 194 | superscaffold35_1959206  | NA                 | Intergenic  |
| 195 | superscaffold35_2288604  | ENSGALG00000008188 | Sca_R012216 |
| 196 | superscaffold35_2469334  | ENSGALG00000008204 | Sca_R012219 |
| 197 | superscaffold35_2481654  | ENSGALG00000008204 | Sca_R012219 |
| 198 | superscaffold35_2554838  | ENSGALG00000002358 | Sca_R012220 |
| 199 | superscaffold35_2602131  | ENSGALG00000002341 | Sca_R012221 |
| 200 | superscaffold35_2855340  | ENSGALG00000002294 | Sca_R000637 |
| 201 | superscaffold35_4010940  | ENSGALG00000002187 | Sca_R000633 |

|     |                         |                    |             |
|-----|-------------------------|--------------------|-------------|
| 202 | superscaffold35_4028537 | ENSGALG00000002187 | Sca_R000633 |
| 203 | superscaffold35_4030425 | ENSGALG00000002187 | Sca_R000633 |
| 204 | superscaffold35_4035880 | ENSGALG00000002187 | Sca_R000633 |
| 205 | superscaffold35_4052684 | ENSGALG00000002187 | Sca_R000633 |
| 206 | superscaffold35_4577951 | NA                 | Intergenic  |
| 207 | superscaffold36_226229  | ENSGALG00000012598 | Sca_R015804 |
| 208 | superscaffold36_239866  | ENSGALG00000012598 | Sca_R015804 |
| 209 | superscaffold36_256792  | ENSGALG00000012601 | Sca_R015803 |
| 210 | superscaffold36_923315  | ENSGALG00000012613 | Sca_R002266 |
| 211 | superscaffold36_925693  | ENSGALG00000012613 | Sca_R002266 |
| 212 | superscaffold36_930185  | ENSGALG00000012613 | Sca_R002266 |
| 213 | superscaffold36_2658779 | ENSGALG00000023179 | Sca_R012790 |
| 214 | superscaffold36_3985614 | ENSGALG00000010694 | Sca_R013726 |
| 215 | superscaffold36_4025190 | ENSGALG00000010697 | Sca_R013724 |
| 216 | superscaffold36_4035008 | ENSGALG00000010697 | Sca_R013724 |
| 217 | superscaffold36_4732084 | ENSGALG00000021843 | Sca_R013719 |
| 218 | superscaffold36_4868949 | ENSGALG00000015209 | Sca_R013718 |
| 219 | superscaffold36_5148004 | ENSGALG00000013493 | Sca_R013716 |
| 220 | superscaffold36_6218627 | ENSGALG00000000184 | Sca_R013706 |
| 221 | superscaffold36_6228311 | ENSGALG00000000184 | Sca_R013706 |
| 222 | superscaffold36_6232412 | ENSGALG00000000184 | Sca_R013706 |
| 223 | superscaffold36_6233766 | ENSGALG00000000184 | Sca_R013706 |
| 224 | superscaffold36_6237911 | ENSGALG00000000184 | Sca_R013706 |
| 225 | superscaffold36_6239135 | ENSGALG00000000184 | Sca_R013706 |
| 226 | superscaffold36_6241286 | ENSGALG00000000184 | Sca_R013706 |
| 227 | superscaffold36_6244041 | ENSGALG00000000184 | Sca_R013706 |
| 228 | superscaffold36_7195956 | ENSGALG00000014691 | Sca_R013699 |
| 229 | superscaffold36_7196418 | ENSGALG00000014691 | Sca_R013699 |
| 230 | superscaffold62_103691  | ENSGALG00000012589 | Sca_R000807 |
| 231 | superscaffold62_129330  | ENSGALG00000012588 | Sca_R000806 |
| 232 | superscaffold62_135162  | ENSGALG00000012588 | Sca_R000806 |
| 233 | superscaffold62_207526  | ENSGALG00000012583 | Sca_R000803 |
| 234 | superscaffold62_2434793 | ENSGALG00000015170 | Sca_R005515 |
| 235 | superscaffold62_2446259 | ENSGALG00000015170 | Sca_R005515 |
| 236 | superscaffold62_2452393 | ENSGALG00000015170 | Sca_R005515 |
| 237 | superscaffold62_2452678 | ENSGALG00000015170 | Sca_R005515 |
| 238 | superscaffold62_2487417 | ENSGALG00000015170 | Sca_R005515 |
| 239 | superscaffold67_660141  | ENSGALG00000015155 | Sca_R004133 |
| 240 | superscaffold67_2890949 | ENSGALG00000015109 | Sca_R012163 |
| 241 | superscaffold67_3518620 | ENSGALG00000015071 | Sca_R002297 |
| 242 | superscaffold67_3601960 | ENSGALG00000015071 | Sca_R002297 |
| 243 | superscaffold67_3770012 | ENSGALG00000015078 | Sca_R002296 |
| 244 | superscaffold67_4114655 | ENSGALG00000015082 | Sca_R002292 |
| 245 | superscaffold67_4116370 | ENSGALG00000015082 | Sca_R002292 |
| 246 | superscaffold67_4126231 | ENSGALG00000015083 | Sca_R002291 |
| 247 | superscaffold67_4135095 | ENSGALG00000015083 | Sca_R002291 |
| 248 | superscaffold67_4153174 | ENSGALG00000015083 | Sca_R002291 |
| 249 | superscaffold67_4154378 | ENSGALG00000015083 | Sca_R002291 |
| 250 | superscaffold67_4163405 | ENSGALG00000015083 | Sca_R002291 |
| 251 | superscaffold67_4231206 | ENSGALG00000015090 | Sca_R002290 |
| 252 | superscaffold67_4235827 | ENSGALG00000015090 | Sca_R002290 |

|     |                           |                    |             |
|-----|---------------------------|--------------------|-------------|
| 253 | superscaffold67_4236416   | ENSGALG00000015090 | Sca_R002290 |
| 254 | superscaffold69-1_2351972 | ENSGALG00000015058 | Sca_R012783 |
| 255 | superscaffold69-1_2435388 | ENSGALG00000015058 | Sca_R012783 |
| 256 | superscaffold69-1_2459535 | ENSGALG00000015058 | Sca_R012783 |
| 257 | superscaffold69-1_3253774 | ENSGALG00000015053 | Sca_R014968 |
| 258 | superscaffold69-1_3269380 | ENSGALG00000015053 | Sca_R014968 |
| 259 | superscaffold69-1_3275623 | ENSGALG00000015052 | Sca_R014969 |
| 260 | superscaffold69-1_3280621 | ENSGALG00000015052 | Sca_R014969 |
| 261 | superscaffold69-1_3346966 | ENSGALG00000015052 | Sca_R014969 |
| 262 | superscaffold69-1_3449149 | ENSGALG00000015050 | Sca_R014971 |
| 263 | superscaffold69-1_3570588 | ENSGALG00000015036 | Sca_R014976 |
| 264 | superscaffold69-1_3753633 | ENSGALG00000015027 | Sca_R014537 |
| 265 | superscaffold69-1_3755995 | ENSGALG00000015027 | Sca_R014537 |
| 266 | superscaffold69-1_3758068 | ENSGALG00000015027 | Sca_R014537 |
| 267 | superscaffold69-1_3767928 | ENSGALG00000015027 | Sca_R014537 |
| 268 | superscaffold69-1_3871477 | ENSGALG00000015024 | Sca_R014538 |
| 269 | superscaffold69-1_3905684 | ENSGALG00000014447 | Sca_R014539 |
| 270 | superscaffold69-1_3908232 | ENSGALG00000014447 | Sca_R014539 |
| 271 | superscaffold69-1_4712843 | ENSGALG00000015721 | Sca_R008063 |
| 272 | superscaffold69-1_4732168 | ENSGALG00000015721 | Sca_R008063 |
| 273 | superscaffold69-1_4789005 | ENSGALG00000015704 | Sca_R008064 |
| 274 | superscaffold69-1_4790214 | ENSGALG00000015704 | Sca_R008064 |
| 275 | superscaffold69-1_4807976 | ENSGALG00000015702 | Sca_R008065 |
| 276 | superscaffold69-1_4863707 | ENSGALG00000015689 | Sca_R008067 |
| 277 | superscaffold69-1_4878444 | ENSGALG00000015689 | Sca_R008067 |
| 278 | superscaffold69-1_4880020 | ENSGALG00000015689 | Sca_R008067 |
| 279 | superscaffold69-1_4884004 | ENSGALG00000015689 | Sca_R008067 |
| 280 | superscaffold69-1_4889552 | ENSGALG00000015689 | Sca_R008067 |
| 281 | superscaffold69-1_4891977 | ENSGALG00000015689 | Sca_R008067 |
| 282 | superscaffold69-1_4929182 | ENSGALG00000015684 | Sca_R008068 |
| 283 | superscaffold69-1_4939284 | ENSGALG00000015683 | Sca_R008069 |
| 284 | superscaffold69-1_5224353 | ENSGALG00000015677 | Sca_R008071 |
| 285 | superscaffold69-1_5349991 | ENSGALG00000015663 | Sca_R008073 |
| 286 | superscaffold69-1_5363529 | ENSGALG00000015663 | Sca_R008073 |
| 287 | superscaffold69-1_5605265 | ENSGALG00000015656 | Sca_R008077 |
| 288 | superscaffold83_470918    | ENSGALG00000015331 | Sca_R009376 |
| 289 | superscaffold83_780198    | NA                 | Intergenic  |
| 290 | superscaffold88_4544      | ENSGALG00000005390 | Sca_R004582 |
| 291 | superscaffold88_61468     | ENSGALG00000005395 | Sca_R004585 |
| 292 | superscaffold88_98217     | ENSGALG00000005423 | Sca_R004587 |
| 293 | superscaffold88_608311    | ENSGALG00000016438 | Sca_R015952 |
| 294 | superscaffold88_609774    | ENSGALG00000016438 | Sca_R015952 |
| 295 | superscaffold93_2073126   | ENSGALG00000015540 | Sca_R002326 |
| 296 | superscaffold93_2219386   | ENSGALG00000015451 | Sca_R002327 |
| 297 | superscaffold93_2219695   | ENSGALG00000015451 | Sca_R002327 |
| 298 | superscaffold93_2752944   | ENSGALG00000015439 | Sca_R002335 |
| 299 | superscaffold93_2760626   | ENSGALG00000015439 | Sca_R002335 |
| 300 | superscaffold93_3821076   | ENSGALG00000015422 | Sca_R002343 |
| 301 | superscaffold93_4046698   | ENSGALG00000015390 | Sca_R002349 |
| 302 | superscaffold93_4360409   | ENSGALG00000015368 | Sca_R002358 |
| 303 | superscaffold93_4552591   | ENSGALG00000015349 | Sca_R002361 |



|     |                         |                    |             |
|-----|-------------------------|--------------------|-------------|
| 304 | superscaffold93_4569813 | ENSGALG00000015349 | Sca_R002361 |
| 305 | superscaffold92_679100  | ENSGALG00000001864 | Sca_R013346 |
| 306 | superscaffold92_690247  | ENSGALG00000001864 | Sca_R013346 |
| 307 | superscaffold92_950477  | ENSGALG00000001801 | Sca_R013341 |
| 308 | superscaffold92_952053  | ENSGALG00000001801 | Sca_R013341 |
| 309 | superscaffold92_970310  | ENSGALG00000001782 | Sca_R013340 |
| 310 | superscaffold92_997630  | ENSGALG00000001765 | Sca_R013339 |
| 311 | superscaffold63_131204  | ENSGALG00000001933 | Sca_R005990 |
| 312 | superscaffold63_201164  | ENSGALG00000001944 | Sca_R005991 |
| 313 | superscaffold63_223923  | ENSGALG00000001947 | Sca_R005992 |
| 314 | superscaffold63_229214  | ENSGALG00000001947 | Sca_R005992 |
| 315 | superscaffold63_231959  | ENSGALG00000001947 | Sca_R005992 |
| 316 | superscaffold63_239120  | ENSGALG00000001947 | Sca_R005992 |
| 317 | superscaffold63_245452  | ENSGALG00000001947 | Sca_R005992 |
| 318 | superscaffold63_296232  | ENSGALG00000002014 | Sca_R005995 |
| 319 | superscaffold63_525625  | ENSGALG00000002125 | Sca_R012170 |
| 320 | superscaffold63_570431  | ENSGALG00000012350 | Sca_R012171 |
| 221 | superscaffold63_584824  | ENSGALG00000012350 | Sca_R012171 |
| 322 | superscaffold63_644598  | ENSGALG00000002142 | Sca_R012172 |
| 323 | superscaffold63_647012  | ENSGALG00000002142 | Sca_R012172 |
| 324 | superscaffold63_779646  | ENSGALG00000002162 | Sca_R012173 |
| 325 | superscaffold63_782313  | ENSGALG00000002162 | Sca_R012173 |
| 326 | superscaffold63_788561  | ENSGALG00000002162 | Sca_R012173 |
| 327 | superscaffold63_789955  | ENSGALG00000002162 | Sca_R012173 |
| 328 | superscaffold63_800655  | ENSGALG00000002162 | Sca_R012174 |
| 329 | superscaffold63_811674  | ENSGALG00000002162 | Sca_R012174 |
| 330 | superscaffold63_812664  | ENSGALG00000002162 | Sca_R012174 |
| 331 | superscaffold63_816173  | ENSGALG00000002162 | Sca_R012174 |
| 332 | superscaffold63_921535  | ENSGALG00000014995 | Sca_R012176 |
| 333 | superscaffold63_969952  | ENSGALG00000010147 | Sca_R012177 |

**Table S5.** Number of SNPs per scaffold.

| <b>Scaffold</b>   | <b>Human chromosome</b> | <b>Scaffold length (bp)</b> | <b>Number of genes</b> | <b>Number of SNPs</b> | <b>Number of SNPs/Mbp</b> |
|-------------------|-------------------------|-----------------------------|------------------------|-----------------------|---------------------------|
| superscaffold26   | 5,18                    | 25310599                    | 54                     | 96                    | 3.79                      |
| superscaffold54   | 3, 5, 6, 8              | 29256470                    | 40                     | 83                    | 2.84                      |
| superscaffold35   | 5                       | 4625539                     | 12                     | 27                    | 5.84                      |
| superscaffold36   | 5                       | 9394175                     | 11                     | 23                    | 2.45                      |
| superscaffold62   | 9                       | 2917291                     | 4                      | 9                     | 3.09                      |
| superscaffold67   | 9                       | 5300260                     | 7                      | 15                    | 2.83                      |
| superscaffold69-1 | 9                       | 5978518                     | 17                     | 34                    | 5.69                      |
| superscaffold83   | 9                       | 782506                      | 1                      | 2                     | 2.56                      |
| superscaffold88   | 9                       | 624114                      | 4                      | 5                     | 8.01                      |
| superscaffold93   | 9                       | 4983591                     | 7                      | 10                    | 2.01                      |
| superscaffold92   | 9                       | 2882843                     | 4                      | 6                     | 2.08                      |
| superscaffold63   | 9                       | 1692925                     | 11                     | 23                    | 13.59                     |

## Supplementary Figure Legends

Fig. S1. Superscaffolds from the optical-map improved ostrich Z assembly plotted against the scaffolds prior to optical mapping using nucmer anchors. For each superscaffold, the red bars indicate the position of SNPs used in the linkage mapping. Genes within each superscaffold are shown with grey rectangles with black borders. Nucmer anchors are shown by orange lines from the superscaffolds to scaffolds. The region within each superscaffold without alignment to scaffolds contain gaps and are indicated by N. The blue scaffolds in superscaffold54 belong to linkage group 2 and are removed from the Z chromosome.

Fig. S2. Construction of synteny blocks for ostrich and chicken Z genes. Top figure depicts the alignment of orthologous genes between ostrich and chicken Z. Bottom figure represents the grouping of genes into synteny blocks by the programme GRIMM\_SYNTENY-2.02. Grey: genes with conserved gene orientation between the two species. Red: inverted genes in one species compared to the other.

Fig S3. A) Lep-MAP2 sex-averaged genetic map of Z chromosome. B) The sex averaged framework map of ostrich Z chromosome as obtained by CRIMAP 2.507 BUILD option. To the left are the genetic positions of the markers in cM and to the right, markers are indicated as superscaffold\_position. The reverse orientation of superscaffolds 54 and 36 is also observed by this analysis. The order of superscaffolds 93, 63 and 92 are also confirmed. The only point of conflict in this map with the results from Lepmap2 are markers 54\_5045452 and 54\_8682873.

Fig. S4. Linkage group 2. A) male map B) female map

Fig. S5. Repeat density in 50 kb window across ostrich Z chromosome. Dashed line represents the PAR boundary (Figure generated by script from (Kapusta and Suh 2017)).

Fig. S6. GRIMM inversion scenarios for the ancestral states. Each arrow is a synteny block.

Fig. S7. GRIMM inversion scenarios for every pair of ancestral state and the species used in this study. Each arrow is a synteny block.

Fig. S8. Alignment of turtle and alligator genes against lizard chromosome 2 and alignment of genes located in lizard unassigned scaffolds and chromosome 2 to ostrich chromosome Z.

Ostrich chromosome Z: 4.73 - 7.1 and 23.76 - 23.83 Mb align to lizard chromosome 1: 34.35-37.1 and 226.35 – 226.44 Mb with conserved order and orientation. Grey: genes with conserved gene orientation between the two species. Red: inverted genes in one species compared to the other.

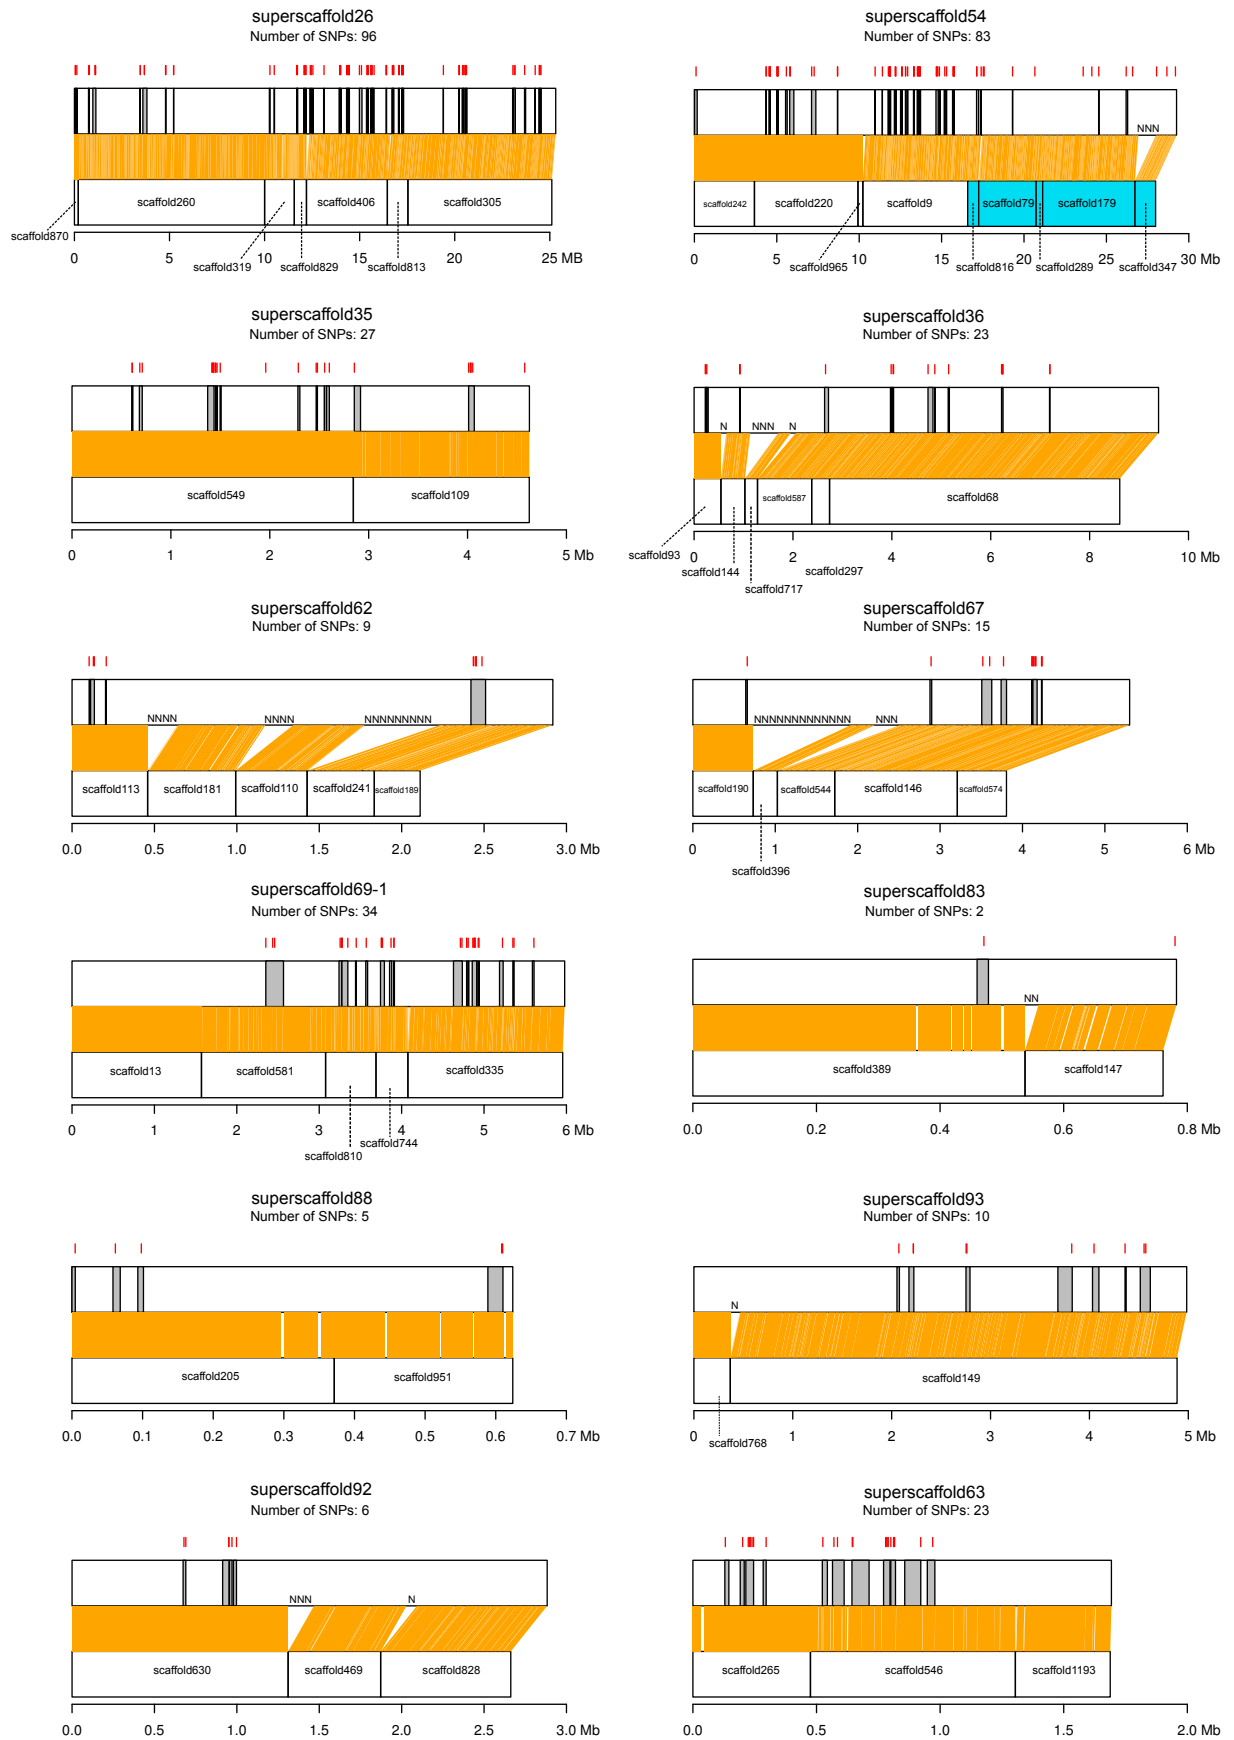

Figure S1.

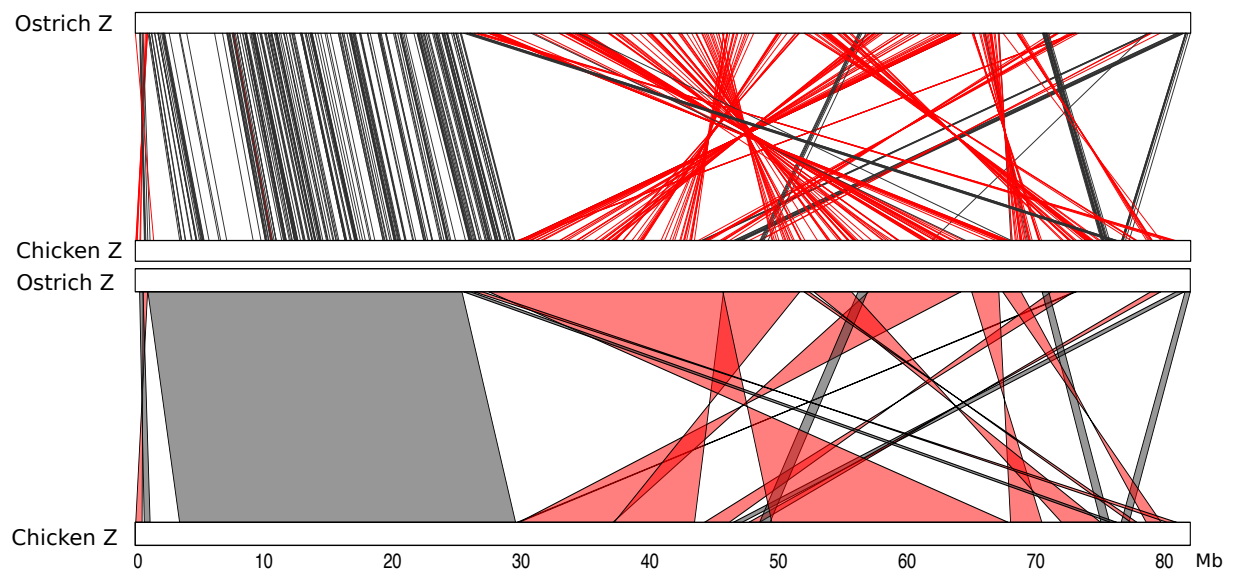

Figure S2.

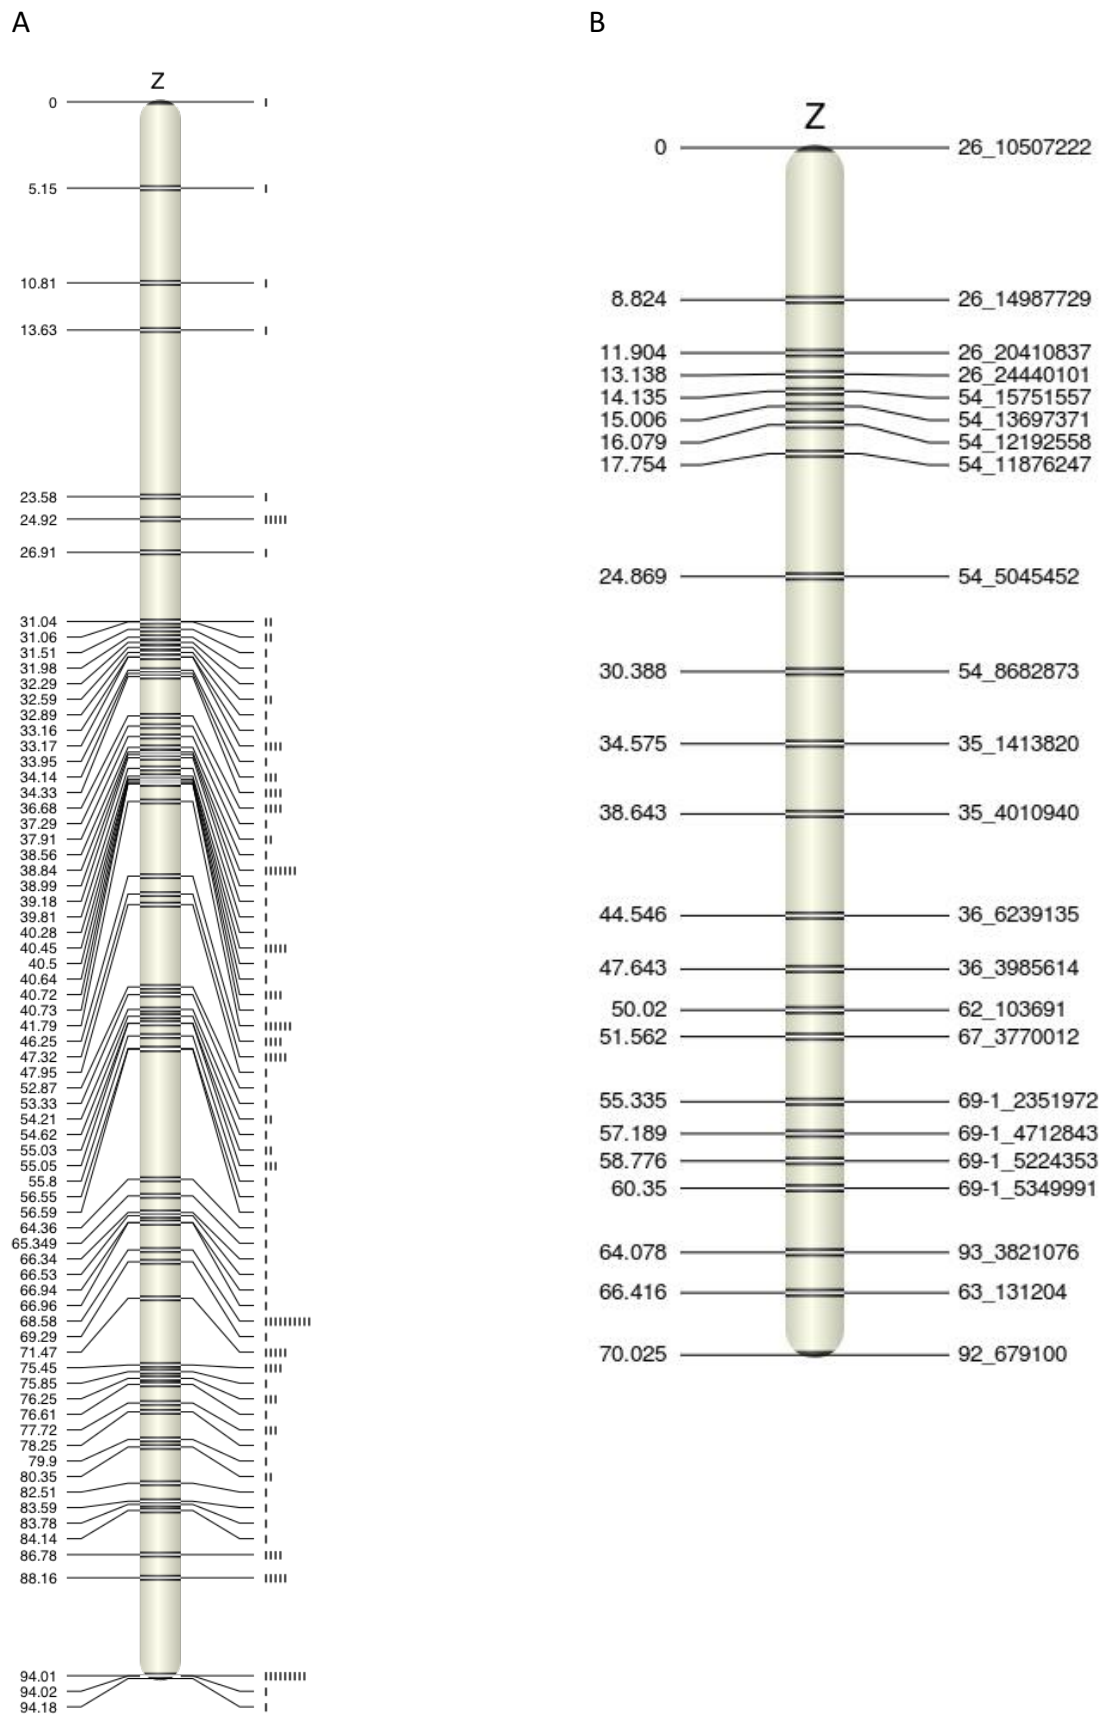

Figure S3.

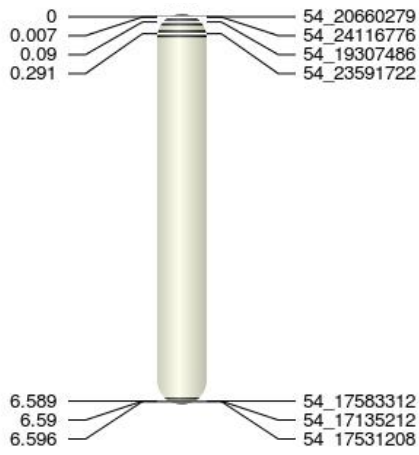

A

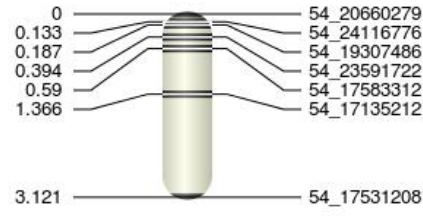

B

Figure S4.



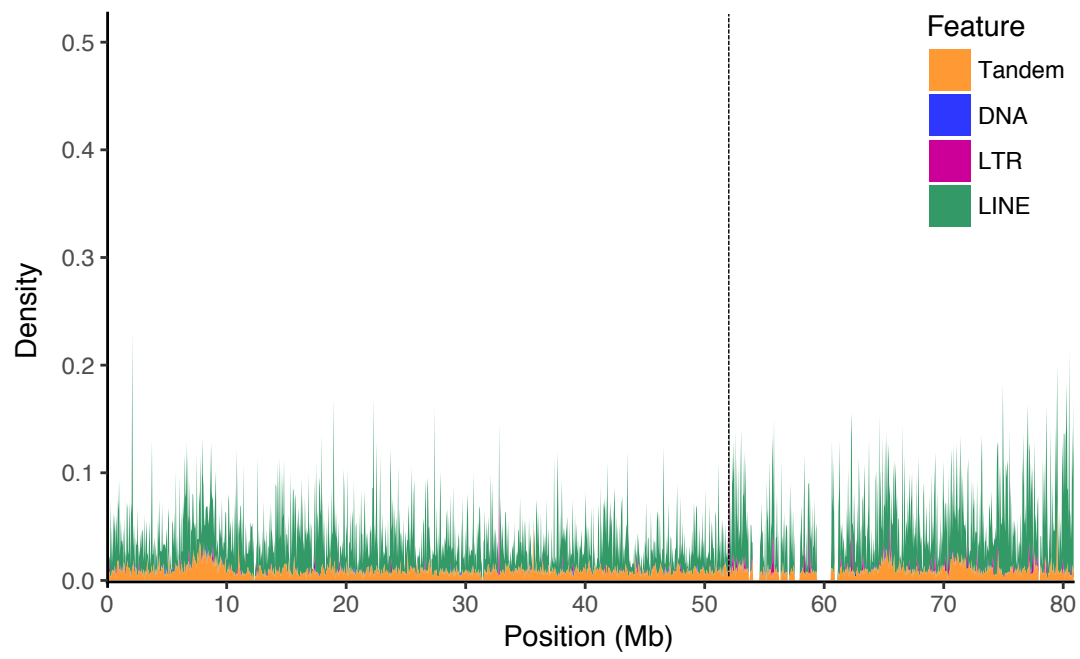

Figure S5.

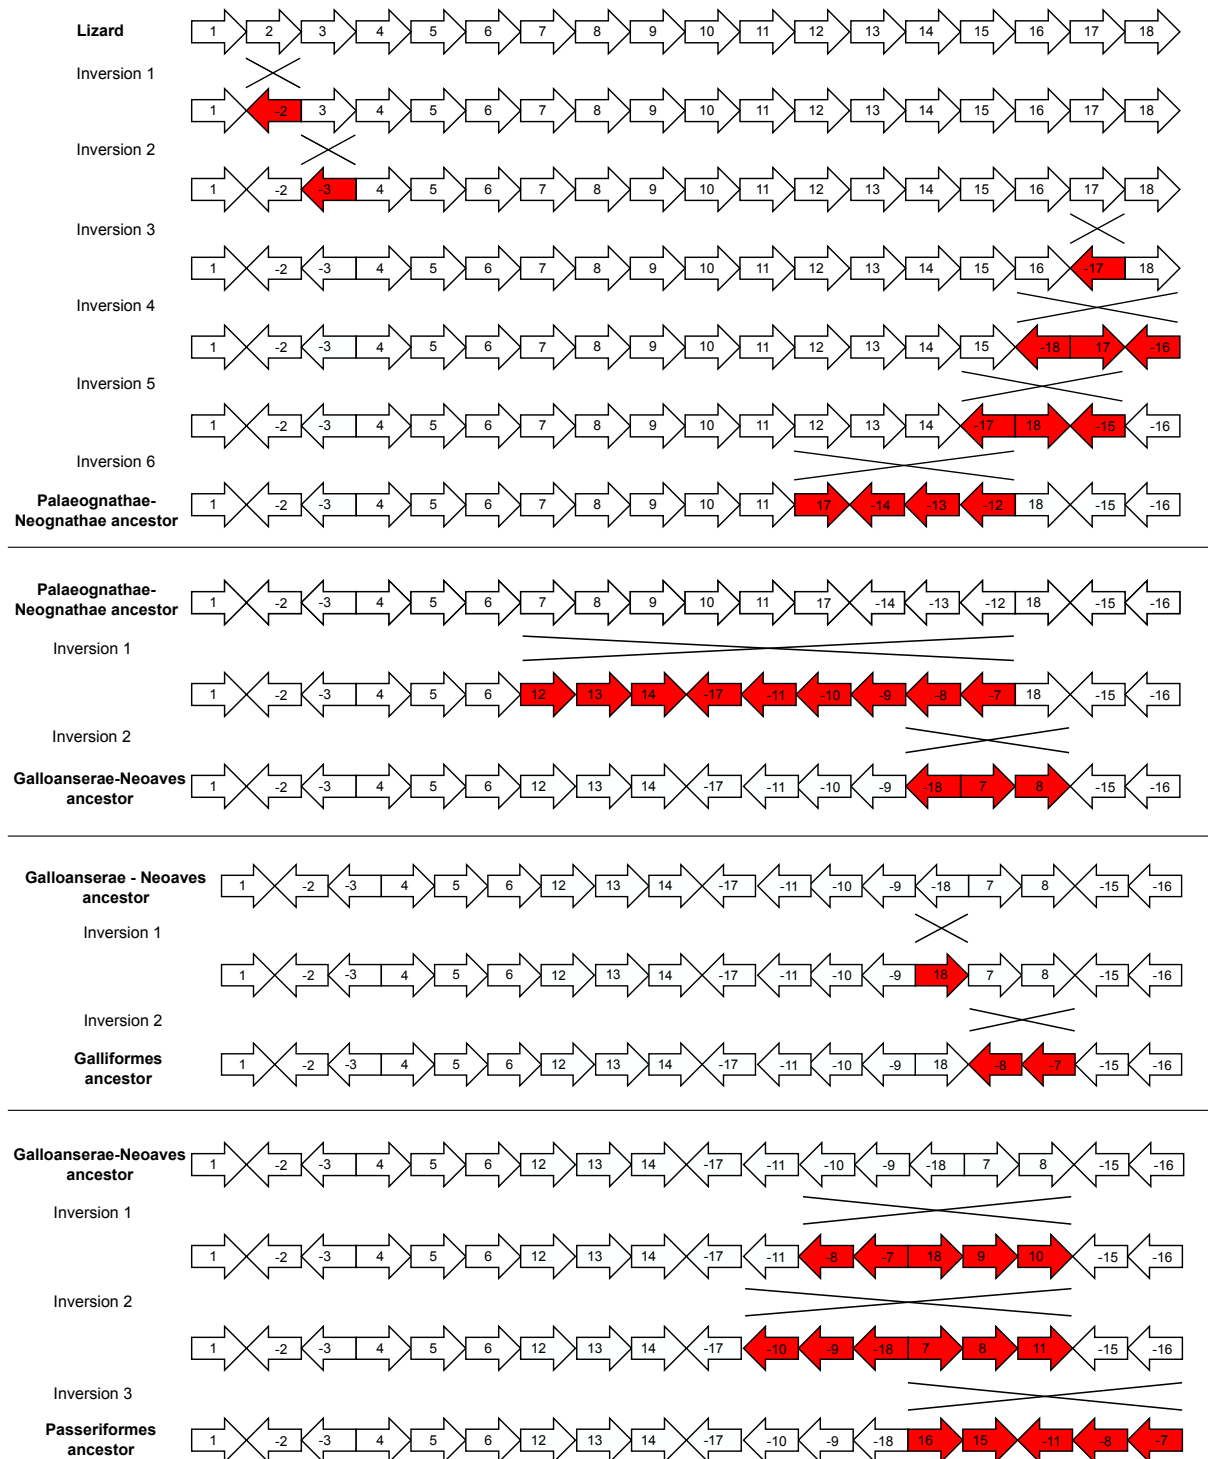

Figure S6.

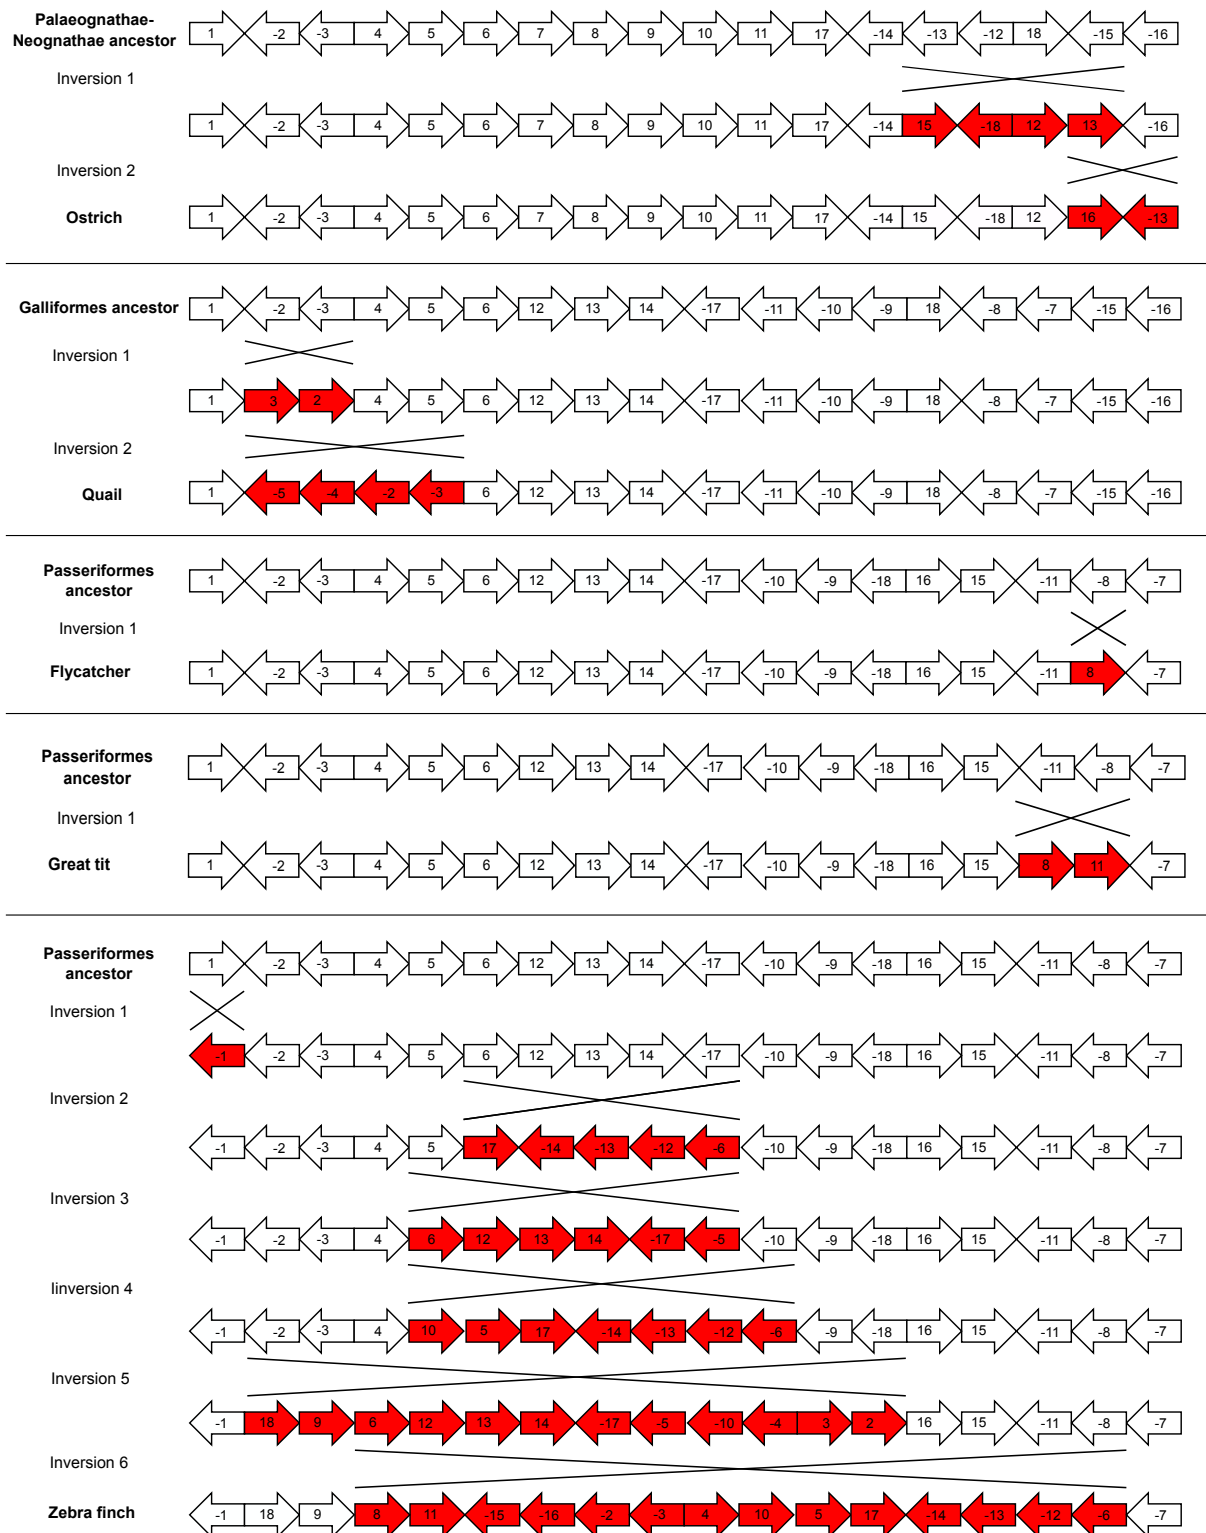

Figure S7.

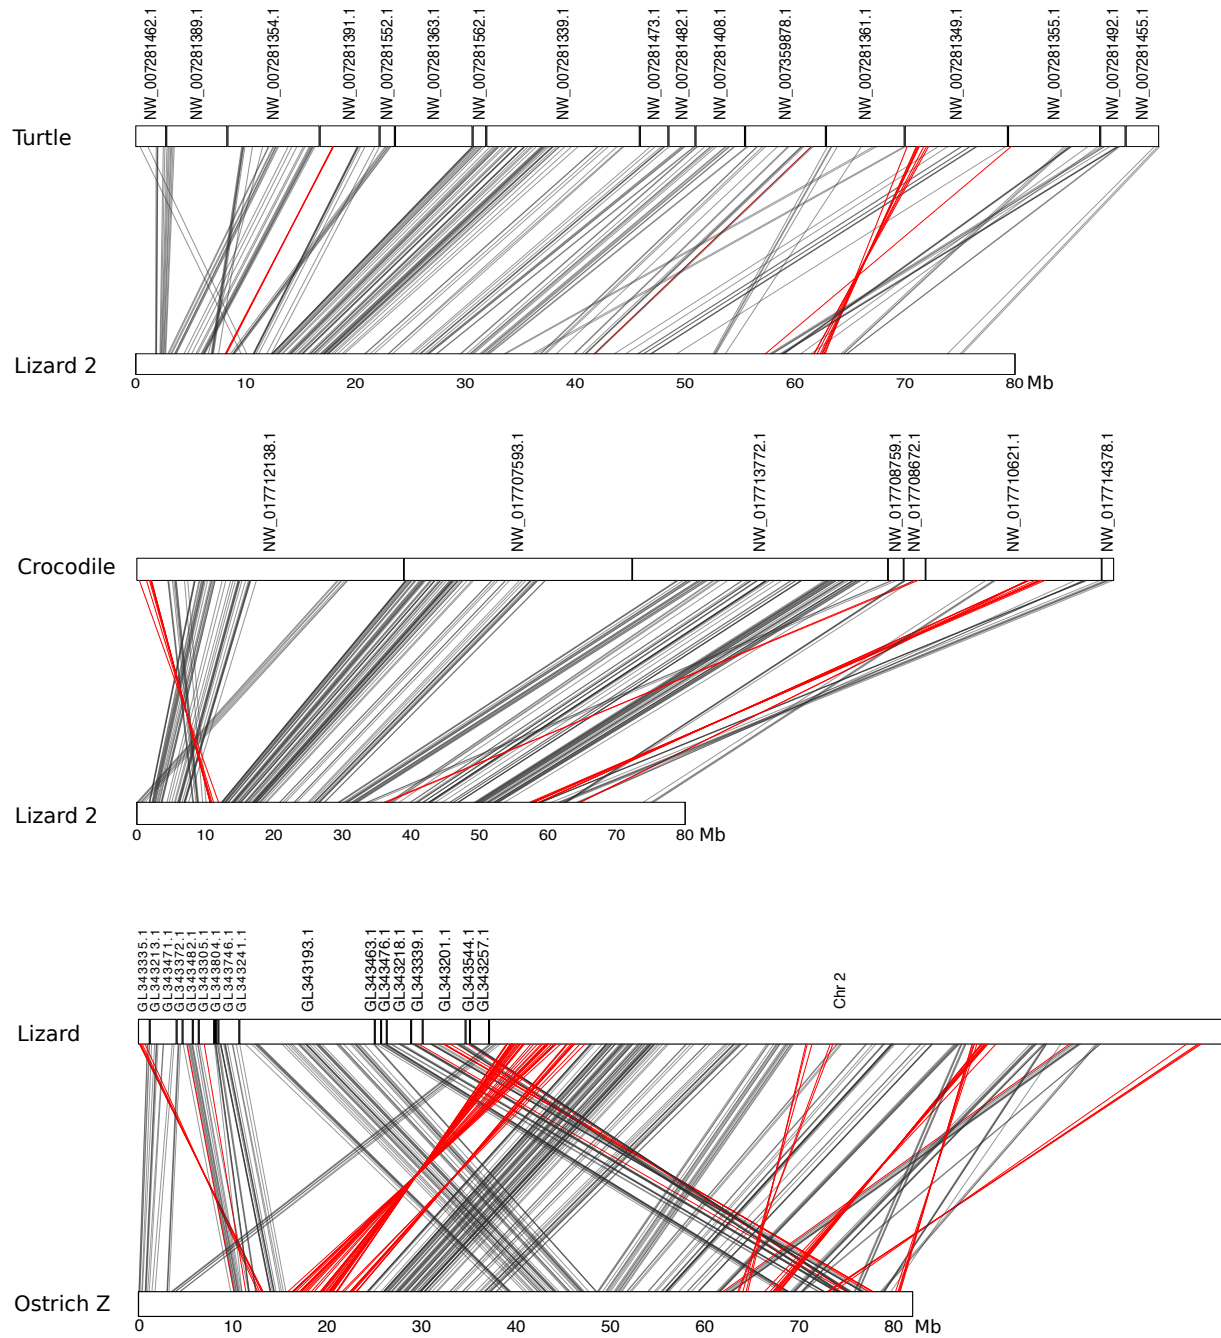

Figure S8.

## References

Adolfsson S, Ellegren H 2013. Lack of Dosage Compensation Accompanies the Arrested Stage of Sex Chromosome Evolution in Ostriches. *Molecular Biology and Evolution* 30: 806-810. doi: 10.1093/molbev/mst009

Braga MD 2009. baobabLUNA: the solution space of sorting by reversals. *Bioinformatics* 25: 1833-1835. doi: 10.1093/bioinformatics/btp285

Kapusta A, Suh A 2017. Evolution of bird genomes-a transposon's-eye view. *Annals of the New York Academy of Sciences* 1389: 164-185. doi: 10.1111/nyas.13295

Ross MT, et al. 2005. The DNA sequence of the human X chromosome. *Nature* 434: 325-337. doi: 10.1038/nature03440

Tesler G 2002. GRIMM: genome rearrangements web server. *Bioinformatics* 18: 492-493. doi: DOI 10.1093/bioinformatics/18.3.492
